# Supplementary material for: Exploring Antibiotic Susceptibility, Resistome and Mobilome Structure of Planctomycetes from Gemmataceae Family
Source: MDPI journal article supplement (doi:10.3390/su13095031), 2021-04-30
Supplement: s1 [file s1]

Supp. Table S1. Major characteristics of studied *Gemmataceae* strains.

| Properties         | <i>G.obscuriglobus</i> DSM 5831 <sup>T</sup> | ' <i>G.massilina</i> ' IIL30 <sup>T</sup> | <i>F.tundricola</i> PL17 <sup>T</sup> | G_18        | <i>T. sphagniphila</i> SP2 <sup>T</sup> | <i>F. ruber</i> SP5 <sup>T</sup> | <i>L. roseus</i> PX52 <sup>T</sup> | <i>Z. formosa</i> A10 <sup>T</sup> | <i>T. immobilis</i> MBLW1 <sup>T</sup> |
|--------------------|----------------------------------------------|-------------------------------------------|---------------------------------------|-------------|-----------------------------------------|----------------------------------|------------------------------------|------------------------------------|----------------------------------------|
| Isolation source   | freshwater                                   | hospital water network                    | shallow-littoral tundra wetland       | fen         | Sphagnum peat bog                       | Sphagnum peat bog                | Mesotrophic lake                   | Sphagnum peat bog                  | Lake                                   |
| Country            | Australia                                    | France                                    | Russia                                | Russia      | Russia                                  | Russia                           | Russia                             | Russia                             | Australia                              |
| Year of isolation  | 1984                                         | 2015                                      | 2019                                  | 2020        | 2010                                    | 2010                             | 2016                               | 2004                               | 2017                                   |
| Morphology         | Spherical                                    | Spherical                                 | Spherical                             | Spherical   | Spherical                               | Spherical                        | Spherical                          | Ellipsoidal                        | Spherical                              |
| Rosette formation  | –                                            | –                                         | –                                     | –           | +                                       | –                                | +                                  | +                                  | –                                      |
| pH, range (opt)    | 7.8–8.8 (nd)                                 | 6–8 (8)                                   | 4.2–6.8(5.0–5.5)                      | 6–8 (7)     | 4–7(5.0–5.5)                            | 4.0–6.8(5.5–6.0)                 | 5.0–7.5(6.5)                       | 3.8–7.2(5.5–6.0)                   | 4.2–6.8(5.0–5.5)                       |
| T, °C, range (opt) | 16–35 (nd)                                   | 25–37 (30)                                | 4–28(15–22)                           | 4–28(15–20) | 6–30(20–26)                             | 10–30(20–25)                     | 10–30(20–25)                       | 10–30 (20–25)                      | 20–40(32–36)                           |
| Genome size, Mb    | 9.06                                         | 9.25                                      | 9.83                                  | 9.23        | nd                                      | 12.36                            | 9.38                               | 10.09                              | 6.69                                   |

Nd-not determined
